# Supplementary material for: Deciphering the Colonization Strategies in Roots of Long-Term Fertilized Festuca rubra
Source: MDPI journal article supplement (doi:10.3390/agronomy12030650), 2022-03-07
Supplement: s1 [file s1]

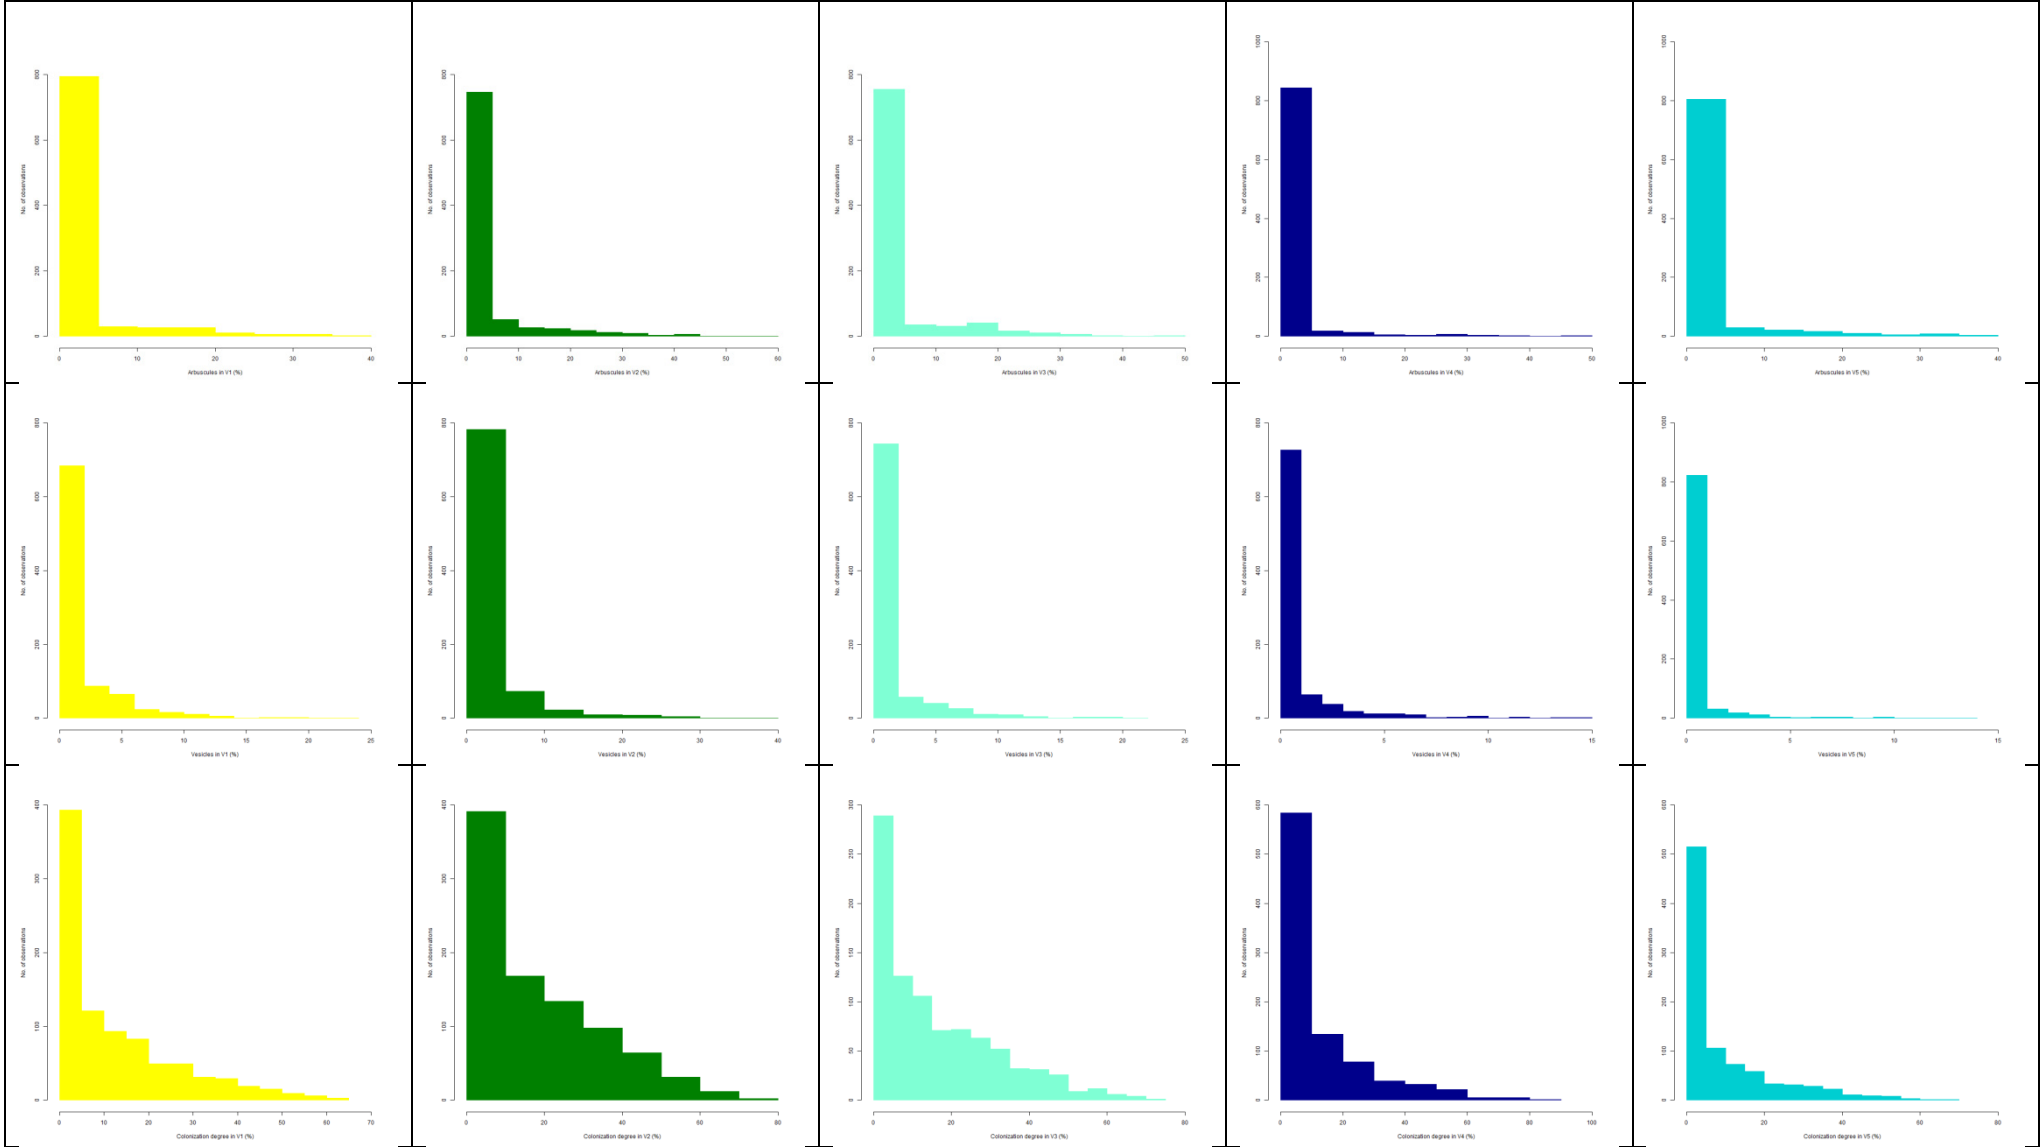

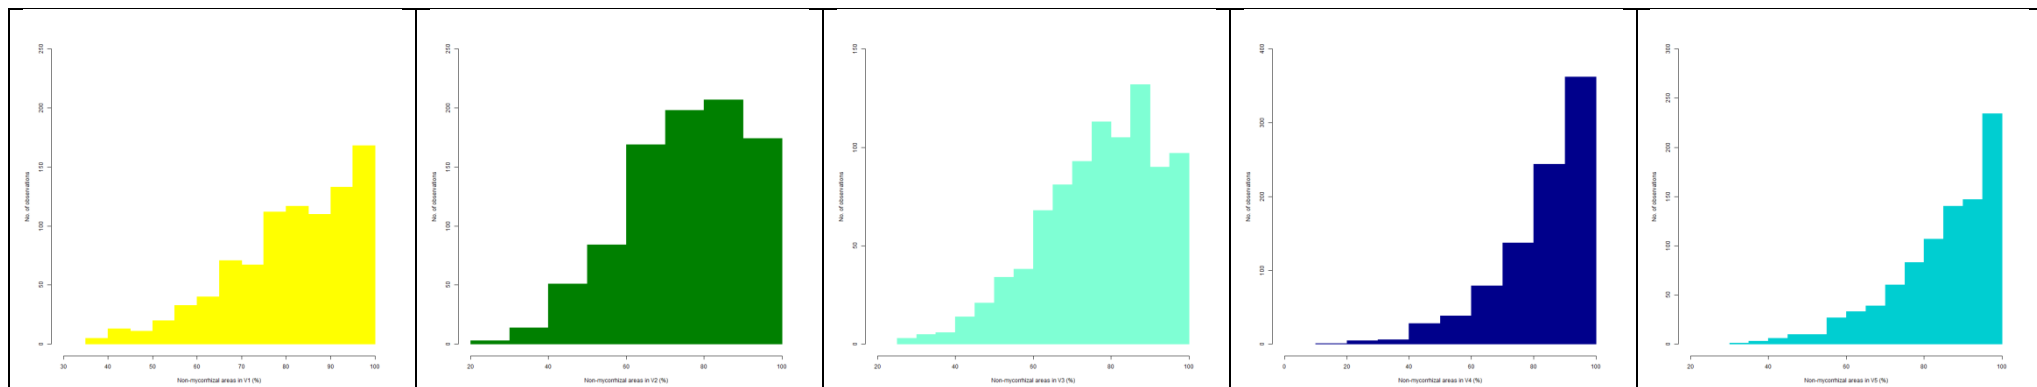

**Figure S2.** Histograms of colonization parameters in roots of *F. rubra* for each experimental variant: a-e) arbuscules abundance (%); f-j) vesicles abundance (%); k-o) colonization degree; p-t) non-mycorrhizal areas (%). Treatments V1-V5: V1 (control variant) – untreated; V2 – organic (manure) treatment – 10 t ha<sup>-1</sup> manure; V3 – low-mineral organic treatment – 10 t ha<sup>-1</sup> manure + 50 N 25 P<sub>2</sub>O<sub>5</sub> 25 K<sub>2</sub>O; V4 – mineral treatment – 100 N 50 P<sub>2</sub>O<sub>5</sub> 50 K<sub>2</sub>O; V5 – high-mineral organic treatment – 10 t ha<sup>-1</sup> manure + 100 N 50 P<sub>2</sub>O<sub>5</sub> 50 K<sub>2</sub>O.
