# Supplementary material for: Deciphering the Colonization Strategies in Roots of Long-Term Fertilized Festuca rubra
Source: MDPI journal article supplement (doi:10.3390/agronomy12030650), 2022-03-07
Supplement: s1 [file s1]

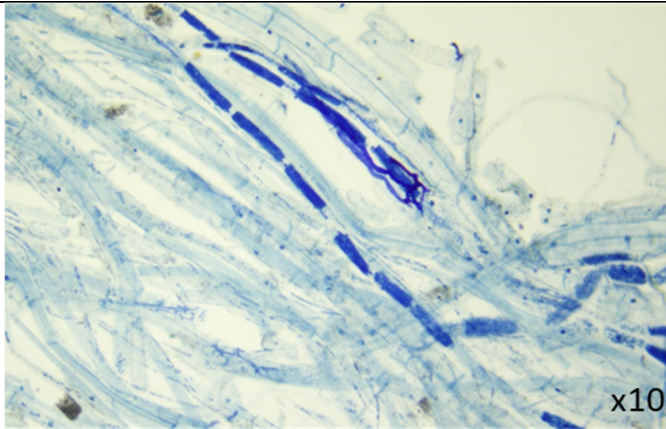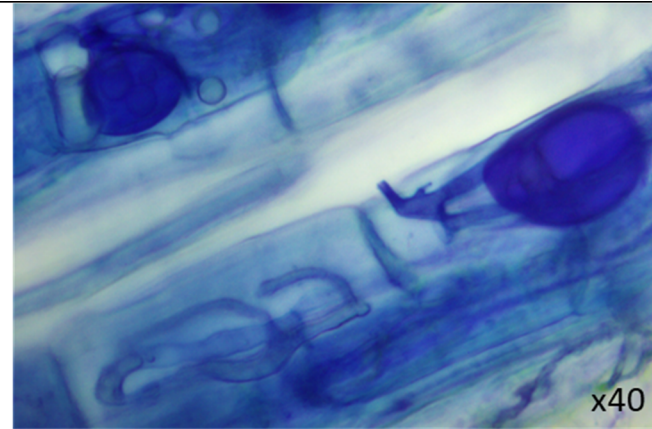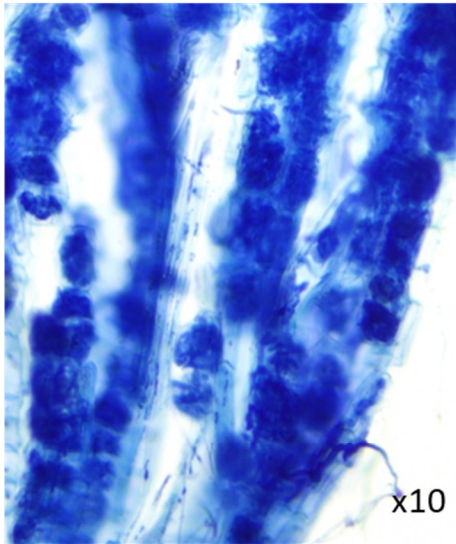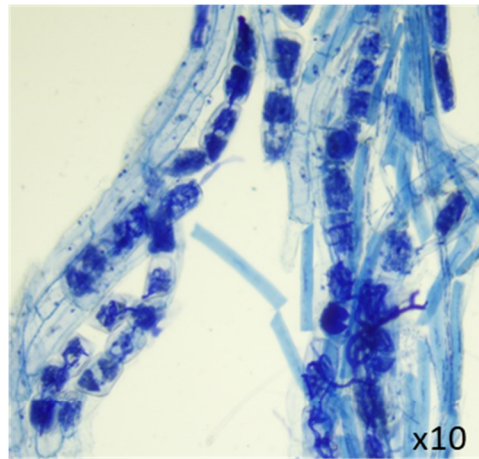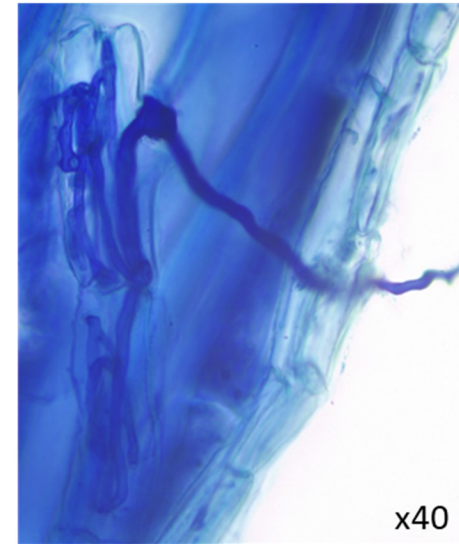

a)

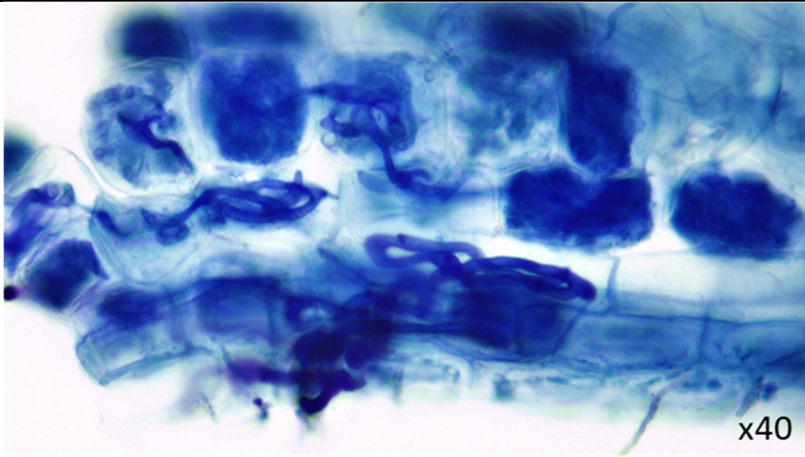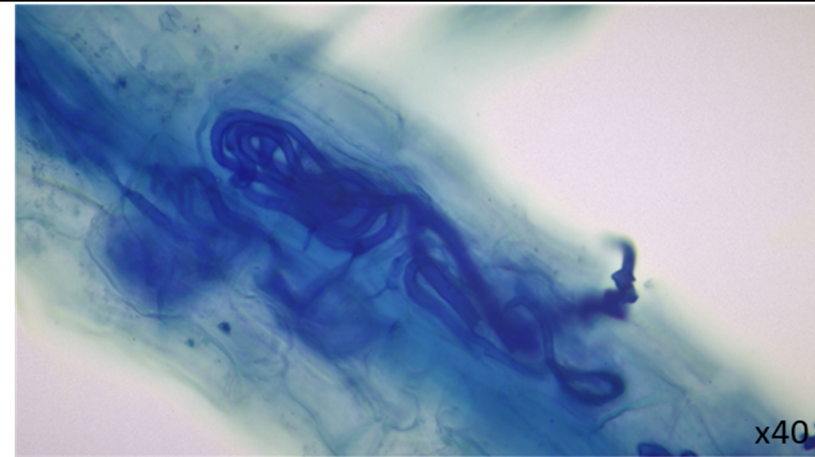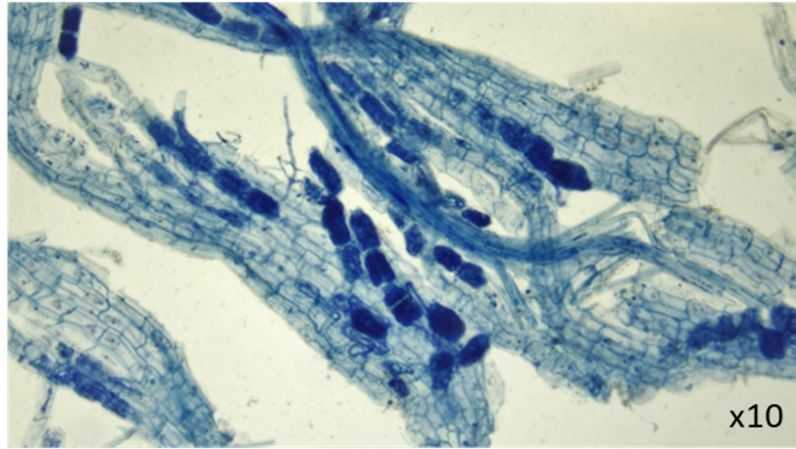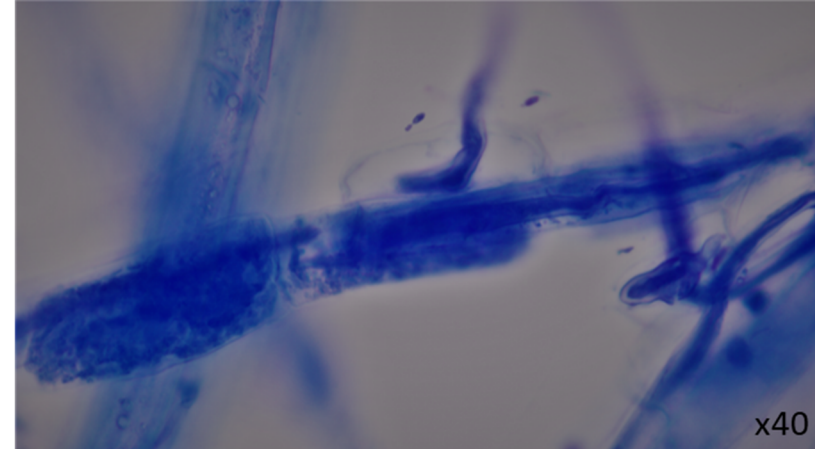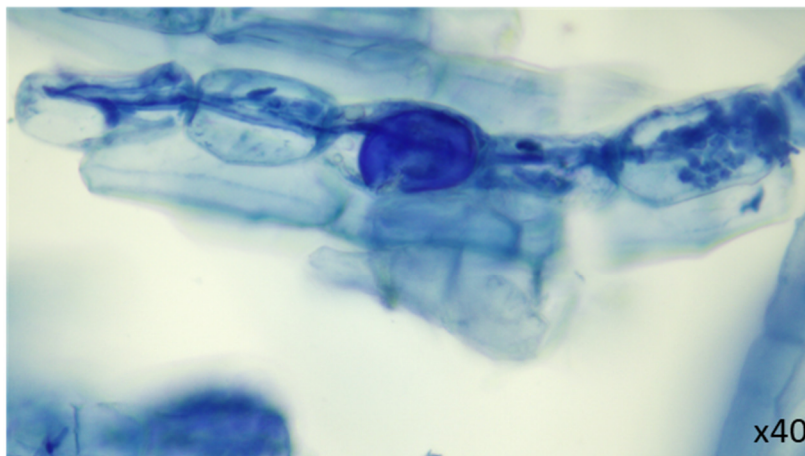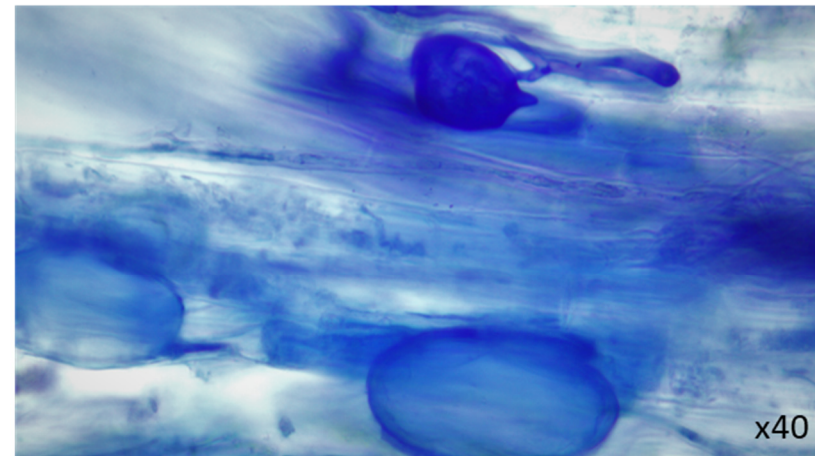

b)



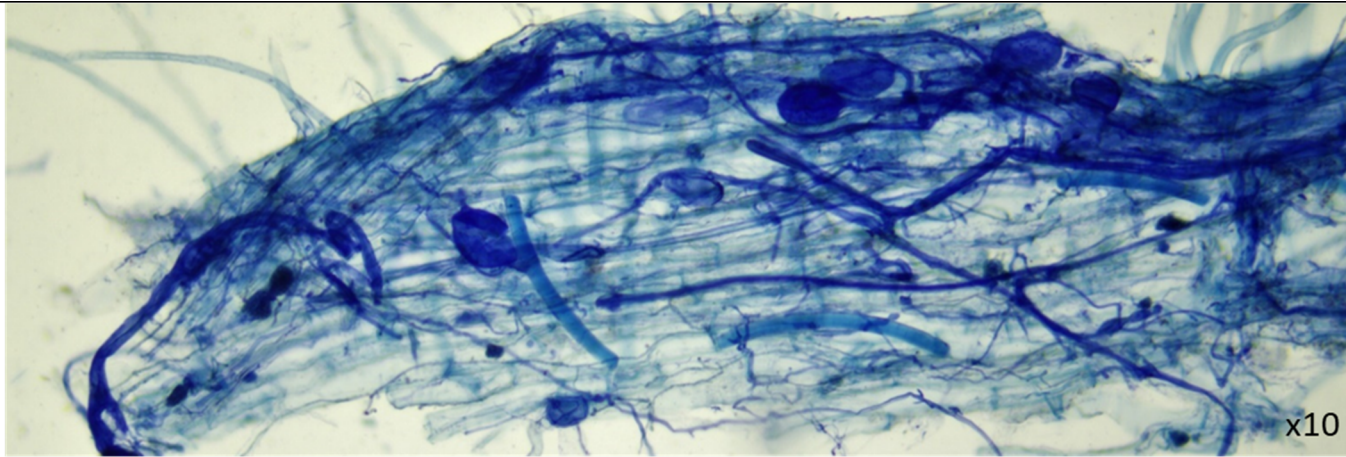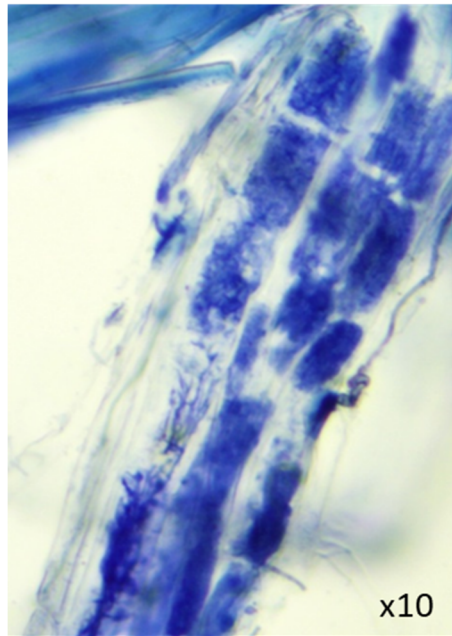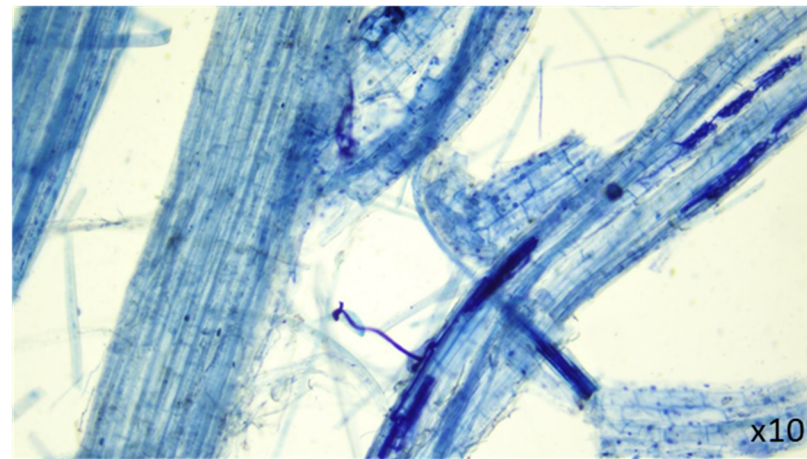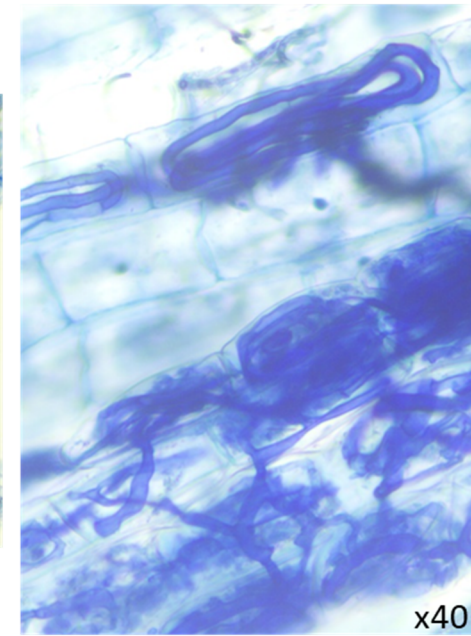

c)

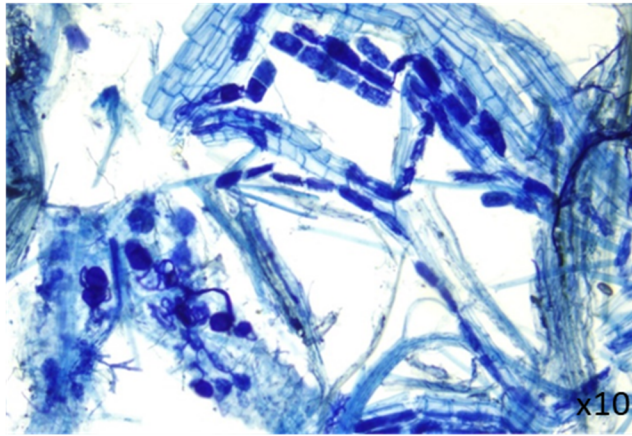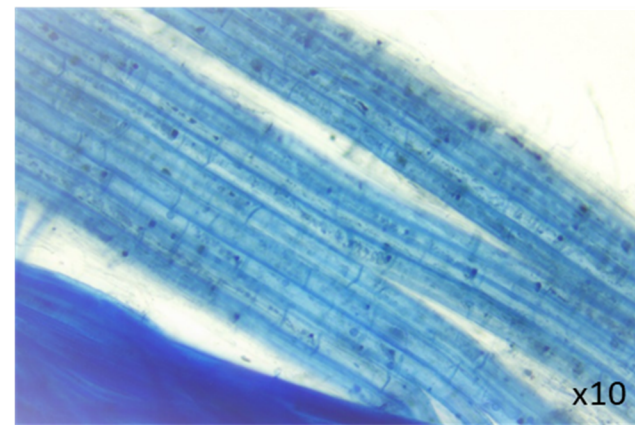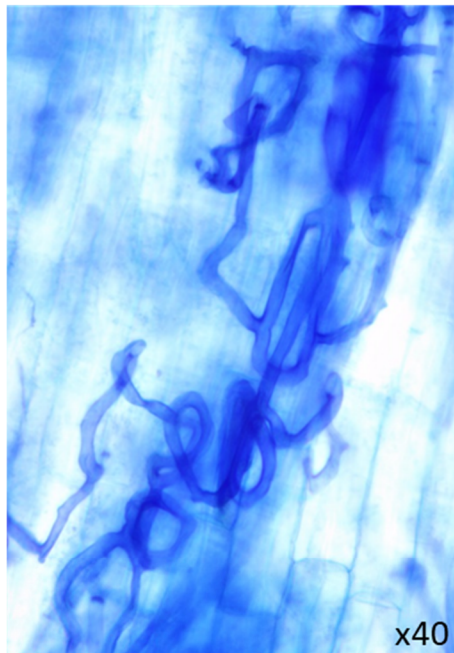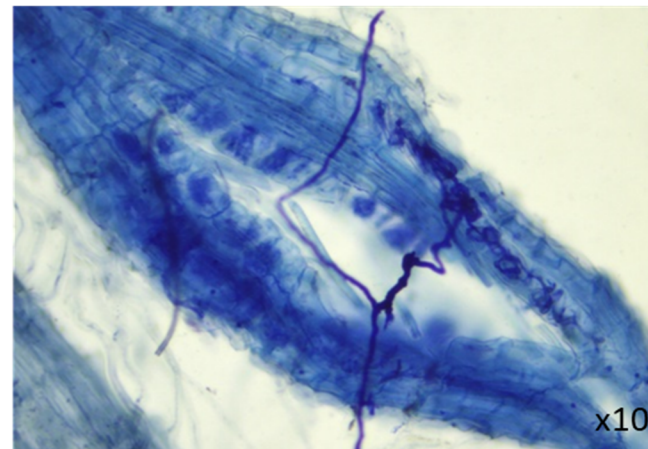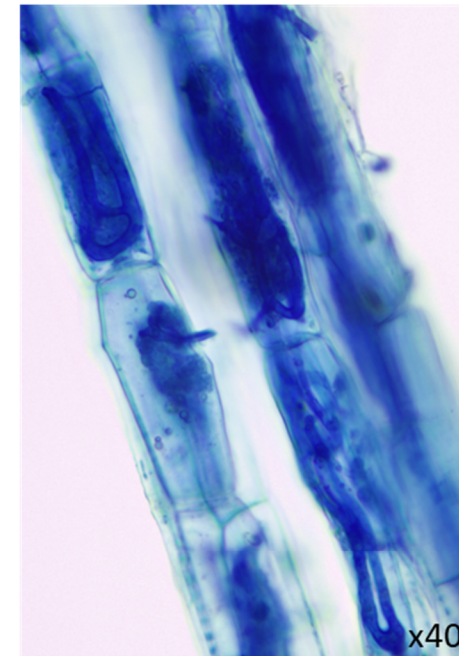

d)



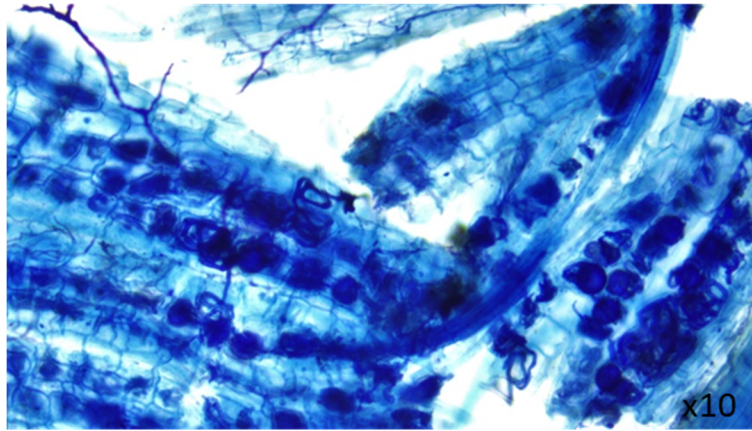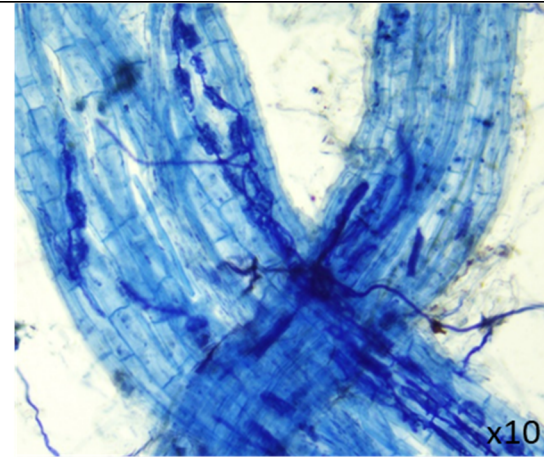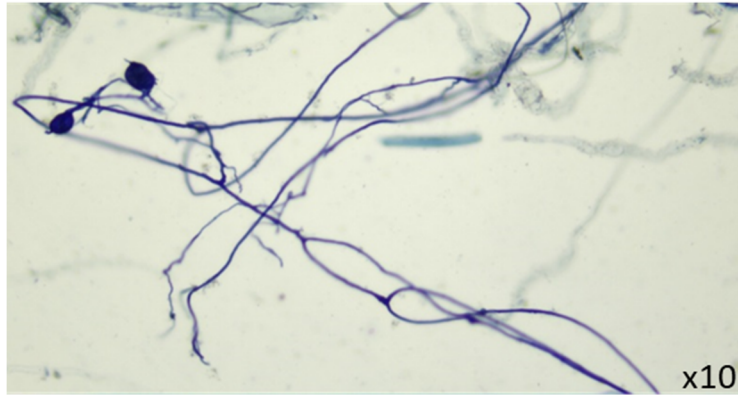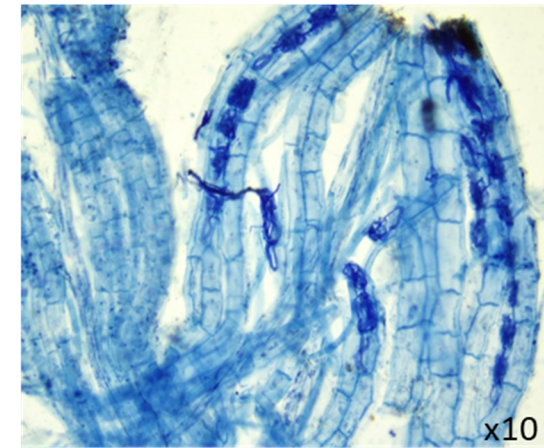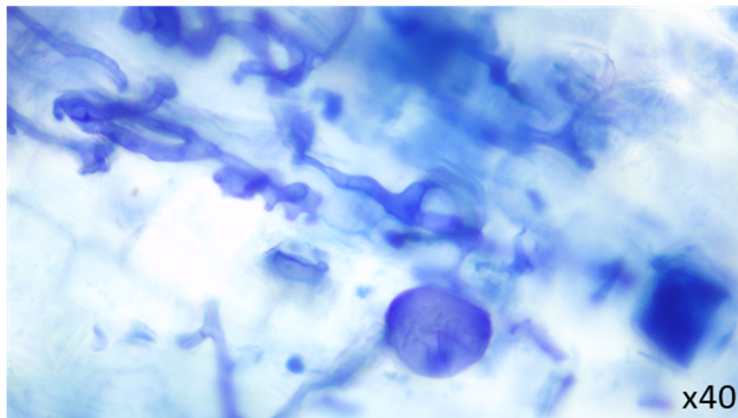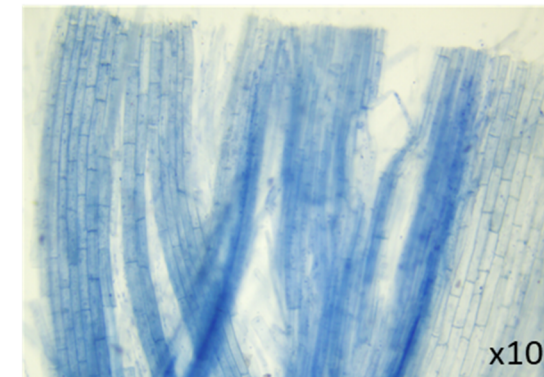

e)

**Figure S1.** Details of mycorrhizal colonization and structures (magnification 10x and 40x) in *F. rubra* roots, for each experimental variant: a) V1 (control variant) – untreated; b) V2 – organic (manure) treatment – 10 t ha<sup>-1</sup> manure; c) V3 – low-mineral organic treatment – 10 t ha<sup>-1</sup> manure + 50 N 25 P<sub>2</sub>O<sub>5</sub> 25 K<sub>2</sub>O; d) V4 – mineral treatment – 100 N 50 P<sub>2</sub>O<sub>5</sub> 50 K<sub>2</sub>O; e) V5 – high-mineral organic treatment - 10 t ha<sup>-1</sup> manure + 100 N 50 P<sub>2</sub>O<sub>5</sub> 50 K<sub>2</sub>O.
