# Supplementary material for: Deciphering the Colonization Strategies in Roots of Long-Term Fertilized Festuca rubra
Source: MDPI journal article supplement (doi:10.3390/agronomy12030650), 2022-03-07
Supplement: s1 [file s1]

**Table S1.** Pearson correlation between mycorrhizal parameters as influenced by long-term treatments

| V1                    | Intensity | Arbuscules | Vesicles | Non-Mycorrhizal areas | Colonization degree | Mycorrhizal /non-mycorrhizal report |
|-----------------------|-----------|------------|----------|-----------------------|---------------------|-------------------------------------|
| Frequency             | 0.91      | 0.29       | 0.21     | -0.91                 | 0.89                | 0.81                                |
| Intensity             |           | 0.38       | 0.17     | -1.00                 | 0.96                | 0.96                                |
| Arbuscules            |           |            | -0.10    | -0.38                 | 0.37                | 0.41                                |
| Vesicles              |           |            |          | -0.17                 | 0.15                | 0.13                                |
| Non-Mycorrhizal areas |           |            |          |                       | -0.96               | -0.96                               |
| Colonization degree   |           |            |          |                       |                     | 0.96                                |

  

| V2                    | Intensity | Arbuscules | Vesicles | Non-Mycorrhizal areas | Colonization degree | Mycorrhizal /non-mycorrhizal report |
|-----------------------|-----------|------------|----------|-----------------------|---------------------|-------------------------------------|
| Frequency             | 0.89      | 0.30       | 0.22     | -0.89                 | 0.89                | 0.73                                |
| Intensity             |           | 0.37       | 0.21     | -1.00                 | 0.97                | 0.93                                |
| Arbuscules            |           |            | -0.07    | -0.37                 | 0.37                | 0.37                                |
| Vesicles              |           |            |          | -0.21                 | 0.21                | 0.20                                |
| Non-Mycorrhizal areas |           |            |          |                       | -0.97               | -0.93                               |
| Colonization degree   |           |            |          |                       |                     | 0.93                                |

  

| V3                    | Intensity | Arbuscules | Vesicles | Non-Mycorrhizal areas | Colonization degree | Mycorrhizal /non-mycorrhizal report |
|-----------------------|-----------|------------|----------|-----------------------|---------------------|-------------------------------------|
| Frequency             | 0.88      | 0.24       | 0.16     | -0.88                 | 0.88                | 0.75                                |
| Intensity             |           | 0.29       | 0.13     | -1.00                 | 0.97                | 0.94                                |
| Arbuscules            |           |            | -0.12    | -0.29                 | 0.26                | 0.24                                |
| Vesicles              |           |            |          | -0.13                 | 0.12                | 0.12                                |
| Non-Mycorrhizal areas |           |            |          |                       | -0.97               | -0.94                               |
| Colonization degree   |           |            |          |                       |                     | 0.94                                |

  

| V4                    | Intensity | Arbuscules | Vesicles | Non-Mycorrhizal areas | Colonization degree | Mycorrhizal /non-mycorrhizal report |
|-----------------------|-----------|------------|----------|-----------------------|---------------------|-------------------------------------|
| Frequency             | 0.91      | 0.24       | 0.24     | -0.91                 | 0.88                | 0.70                                |
| Intensity             |           | 0.29       | 0.21     | -1.00                 | 0.97                | 0.89                                |
| Arbuscules            |           |            | -0.03    | -0.29                 | 0.28                | 0.23                                |
| Vesicles              |           |            |          | -0.21                 | 0.19                | 0.15                                |
| Non-Mycorrhizal areas |           |            |          |                       | -0.97               | -0.89                               |
| Colonization degree   |           |            |          |                       |                     | 0.91                                |

  

| V5        | Intensity | Arbuscules | Vesicles | Non-Mycorrhizal areas | Colonization degree | Mycorrhizal /non-mycorrhizal report |
|-----------|-----------|------------|----------|-----------------------|---------------------|-------------------------------------|
| Frequency | 0.93      | 0.35       | 0.19     | -0.93                 | 0.90                | 0.83                                |

|                       |      |       |       |       |       |
|-----------------------|------|-------|-------|-------|-------|
| Intensity             | 0.42 | 0.17  | -1.00 | 0.96  | 0.96  |
| Arbuscules            |      | -0.03 | -0.42 | 0.40  | 0.41  |
| Vesicles              |      |       | -0.17 | 0.16  | 0.15  |
| Non-Mycorrhizal areas |      |       |       | -0.96 | -0.96 |
| Colonization degree   |      |       |       |       | 0.96  |

---

Note: V1 (control variant) – untreated; V2 – organic (manure) treatment – 10 t ha<sup>-1</sup> manure; V3 – low-mineral organic treatment – 10 t ha<sup>-1</sup> manure + 50 N 25 P<sub>2</sub>O<sub>5</sub> 25 K<sub>2</sub>O; V4 – mineral treatment – 100 N 50 P<sub>2</sub>O<sub>5</sub> 50 K<sub>2</sub>O; V5 – high-mineral organic treatment - 10 t ha<sup>-1</sup> manure + 100 N 50 P<sub>2</sub>O<sub>5</sub> 50 K<sub>2</sub>O.
